# Supplementary material
Source: Springer Nature journal article supplement (https://www.springerprofessional.de/resource/supplementary/13638_2012_544_MOESM15_ESM.pdf/11898030)

Amplitude PDF Plots

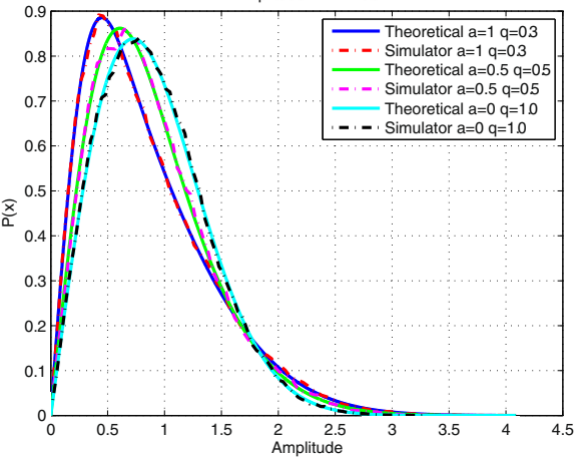

Supplement: MOESM15 [file 11898030]
